# Supplementary material for: Coordinated β-globin expression and α2-globin reduction in a multiplex lentiviral gene therapy vector for β-thalassemia
Source: PubMed Central journal article supplement — Mol Ther. 2021 May 1;29(9):2841–53. doi: 10.1016/j.ymthe.2021.04.037 (PMC8417505; doi:10.1016/j.ymthe.2021.04.037), 2021-05-01
Supplement: mmc1.pdf [file mmc1.pdf]

## **Supplemental Information**

### **Coordinated $\beta$ -globin expression and $\alpha 2$ -globin reduction in a multiplex lentiviral gene therapy vector for $\beta$ -thalassemia**

**Tiwaporn Nualkaew, Karine Sii-Felice, Marie Giorgi, Bradley McColl, Julie Gouzil, Astrid Glaser, Hsiao P.J. Voon, Hsin Y. Tee, George Grigoriadis, Saovaros Svasti, Suthat Fucharoen, Suradej Hongeng, Philippe Leboulch, Emmanuel Payen, and Jim Vadolas**

## Supplementary Information

### SUPPLEMENTAL MATERIAL AND METHODS

#### Validation of the $\alpha$ -globin-specific siRNA

In order to identify and evaluate effective  $\alpha$ -globin-specific siRNA target sequences, 5 siRNAs targeting human  $\alpha$ -globin were electroporated into K562 cells (Supplemental Table S2). Four sequences (sia-1, sia-2, sia-3 and sia-4) generated significant reductions in human  $\alpha$ -globin mRNA compared to negative controls (mock and siLuc electroporated K562 cells) 24 hrs and 48 hrs post electroporation as detected by real-time PCR. In brief,  $5 \times 10^6$  K562 cells mixed with siRNA in 0.5ml of Opti-Mem, were transferred to 0.4 cm cuvettes and electroporated with the Gene Pulser (Bio-Rad, Hercules, CA, USA) using the following conditions: 226 Volts, 950  $\mu$ F,  $\infty$  resistance. Cells were then cultured in 10 ml DMEM containing 10% FCS and 30  $\mu$ M hemin for erythroid differentiation and incubated at 37°C. Relative  $\alpha$ -globin RNA expression levels were detected by real-time PCR 24 and 48 hours post electroporation. The most effective siRNA, sia-1 and sia-2, reduced  $\alpha$ -globin mRNA by 95% $\pm$ 5% and 83% $\pm$ 6% relative to negative controls, while sia-3 and sia-4 generated modest, though significant, reductions of 35% $\pm$ 13% and 47% $\pm$ 14% respectively ( $p < 0.05$ ), and sia-5 had no effect. Analysis of efficacy over time demonstrated that 1  $\mu$ g of sia-3 and sia-4 generated modest reductions in  $\alpha$ -globin mRNA expression which remained significant at 48 hours relative to negative controls (Figure S3). In humans, the  $\alpha$ -globin is encoded by two highly homologous *HBA1*( $\alpha 1$ ) and *HBA2*( $\alpha 2$ )

23 *genes*. These genes differ significantly over the 3' UTRs. Whereas si $\alpha$ -1, si $\alpha$ -2 and si $\alpha$ -3  
24 target both genes, si $\alpha$ -4 specifically targets *HBA2*.

25

## 26 **Lentiviral vector comparison**

27 Vesicular stomatitis virus glycoprotein (VSVG) pseudotyped lentiviral supernatants were  
28 produced by transient transfection of HEK293T cells with the plasmid vector and the 3-  
29 plasmid packaging system made of HPV275,  $\psi$ N15 and p633.<sup>1</sup> Lentiviral particles were  
30 produced and purified with a Mustang Q anion exchange membrane cartridge (Pall, Saint  
31 Germain-en-Laye, France) and a 40K ZebaSpin desalting column (Thermo Fisher  
32 Scientific, Villebon, France) before concentration by overnight precipitation with Lentivirus  
33 precipitation solution (Alstem, Richmond, CA). Infectious titers were determined in  
34 NIH3T3 cells. Notably, no observable difference was identified in the titres of LV $\beta$ -shRNA  
35 vectors from culture supernatants harvested 24 hours post-transfection of HEK 293T,  
36 before and after purification and ultracentrifugation (Figure S4). Based on these results,  
37 the insertion of the miR30-shRNA expression cassette into LV $\beta$  gene therapy vector did  
38 not interfere with LV vector production or transduction.

39

## 40 **Flow cytometry**

41 To determine knockdown efficiency of LV $\beta$ -shGFP, eGFP expression of transduced-MEL-  
42  $\beta$ eGFP cells were determined by flow cytometry at day 3-10 of erythroid differentiation.  
43 Cells were washed and resuspended in 1X PBS. Cells were analysed using BD LSR II  
44 flow cytometer (BD Biosciences).  $\beta^{\text{A-T87Q}}$ -globin expression of transduced cells was  
45 assessed by intracellular staining. Briefly,  $1 \times 10^6$  cells were fixed with 100  $\mu$ l of ice-cold

46 4% paraformaldehyde at room temperature for 10 minutes. Cells were washed with 1X  
47 PBS and permeabilized with 200 µl of ice-cold 0.1% Triton X-100 (v/v) in 2% FCS-PBS at  
48 room temperature for 5 minutes. Cells were washed with 2% FCS-PBS.  $1 \times 10^5$  cells were  
49 stained with 2 µl of antibody against human  $\beta$ -globin and incubated on ice for 30 minutes.  
50 Cells were washed 3 times with 2% FCS-PBS and subjected to analysis using BD LSR II  
51 flow cytometer (BD Biosciences). Data were acquired on a LSR II cytometer (BD, San  
52 Jose, CA) using FACS Diva software. For determination of erythroid differentiation  
53 profiles, cells were stained with antibodies directed against CD235A, CD36, and CD71  
54 and subjected to analysis using MACSQuant cytometer (Miltenyi Biotech) and analysed  
55 using FlowJo software (Tree Star, OR, USA). Antibodies used are listed in Supplemental  
56 Table S5.

57

### 58 **High performance liquid chromatography**

59 Percentage of the globin chains in human samples was determined by high-performance  
60 liquid chromatography (HPLC) with a Prominence chromatograph (Shimadzu). Cells  
61 lysates were injected onto an Aeris Widepore 3.6 µm C4 column 250×4.6 mm  
62 (Phenomenex). Elution was achieved with a gradient of buffer A (30% acetonitrile (Carlo  
63 Erba), 0.07% trifluoroacetic acid (Sigma Aldrich) in Milli-Q water and buffer B (50%  
64 acetonitrile, 0.05% trifluoroacetic acid), with 48% as an initial percentage of buffer B, in  
65 75 minutes at a total flow rate of 0.8 mL/min at 30°C. The detection wavelength was 220  
66 nm. Data acquisition was performed with the LC Solution software (Shimadzu).

67

68

69 **Analysis of globin precipitates by western blot**

70 Cells were lysed in Milli-Q water then centrifuged to obtain water-soluble cell fractions.  
71 Membrane fractions was extensively washed in 0.05% PBS and resuspended in 56 mM  
72 sodium borate (pH 8.0) with 0.5% Triton X-100. After 20 minutes incubation on ice,  
73 membrane fractions was centrifuged at 16,000xg, 4°C for 10 minutes. Precipitated globins  
74 were dissolved in 1X sample loading buffer for Western blot analysis. <sup>2, 3</sup>

75

76 **Protein analysis by western blot**

77 Total cell lysate was prepared using RIPA lysis buffer system (SantaCruz Biotechnology,  
78 Dallas, TX). Briefly,  $5 \times 10^6$  washed-cells were gently resuspended in 200 µl of ice cold  
79 RIPA lysis buffer (100 mM Tris-HCl pH 7.5, 150 mM NaCl, 1% Nonidet P-40, 0.5% sodium  
80 deoxycholate, 0.1% SDS, 0.004% sodium azide), 2 mM PMSF solution, 1 mM sodium  
81 orthovanadate solution and 10% (v/v) protease inhibitor cocktail solution (Sigma Aldrich).  
82 Lysis reaction was incubated on ice for 30 minutes and centrifuged at 10,000xg, 4°C for  
83 10 minutes. The supernatant which is total cell lysate was collected to new tube and stored  
84 at -20°C.

85

86 **Quantification of proteins**

87 Proteins in total cell lysates were quantified using BCA protein assay kit (Thermo  
88 Scientific) according to the manufacturer's protocol. Briefly, BSA standard curve was  
89 generated in the range of 0-1,000 µg/ml. A working reagent (WR) solution was prepared  
90 by mixing BCA Reagent A with BCA Reagent B at ratio 50:1. 1 ml of WR solution was  
91 combined to 50 µl of protein sample or standard BSA and incubated at 37°C for 30

92 minutes. After incubation, the reaction was transferred to cuvette and measured using a  
93 spectrophotometer at OD562. Protein quantity was calculated using linear regression.

94

#### 95 **Western blot analysis of globin chains**

96 K562: A total 10 µg of protein cell lysate was denatured by heating at 95°C for 5 minutes  
97 in 1X sample loading buffer (50 mM Tris-HCl pH 6.8, 100 mM DTT, 2% SDS, 10% glycerol,  
98 0.02% bromophenol blue) and separated on 4-15% SDS-polyacrylamide Mini-  
99 PROTEAN® TGX™ precast gel (Bio-Rad, Hercules, CA) in Tris-glycine running buffer (25  
100 mM Tris pH 8.3, 192 mM Glycine, 0.1% SDS) at 120 volts for 40 minutes. After  
101 electrophoresis, protein was transferred to 0.22 µm PVDF membrane (GE healthcare,  
102 Chicago, IL) in Towbin transfer buffer (25 mM Tris, 192 mM glycine, 10% methanol) at  
103 100 V for 90 minutes in cold room. After blocking the membranes in 1X Tris buffer saline  
104 (TBS) with Tween-20 (20 mM Tris-Hcl pH 7.5, 154 mM NaCl, 0.1% Tween-20  
105 supplemented with 3% bovine serum albumin (BSA)) at room temperature for 2 hours,  
106 membranes were incubated with primary antibody either against human α-globin (at  
107 dilution 1:10,000 in 3% BSA-TBS-T or human β-globin (at dilution 1:10,000 in 3% BSA-  
108 TBS-T or human β-actin antibody conjugated with horseradish peroxidase (HRP) (at  
109 dilution 1: 20,000 in 3% BSA-TBS-T at 4°C overnight. Membranes were washed 3 times  
110 with 1X TBS-T for 10 minutes each wash before incubated with secondary antibody  
111 conjugated with HRP at dilution 1:5,000 in 3% BSA-TBS-T at room temperature for 2  
112 hours when required. Membranes were washed 3 times with 1X TBS-T for 10 minutes  
113 each wash before protein was detected by ImageQuant LAS4000 (GE Healthcare) using  
114 ECL solution (1.25 mM Luminol, 200 µM p-Coumaric acid, 0.01% H<sub>2</sub>O<sub>2</sub>, 100 mM Tris-HCl  
115 pH 8.5) according to the manufacturer's protocol.

116

117 **Cell lines**

118 i) The MEL- $\beta$ eGFP cell is derived from the MEL (murine erythroleukemia) cell line  
119 modified to carrying the 180kb BAC human genomic fragment containing the  $\beta$ -globin  
120 locus, where the coding regions of the  $\beta$ -globin has been replaced by the eGFP reporter.<sup>4</sup>  
121 Cells were grown and maintained in DMEM supplemented with 10% FCS, 100 U/ml  
122 penicillin and 100 g/ml streptomycin at 37°C 5% CO<sub>2</sub>. Cells were induced to undergo  
123 erythroid differentiation by culturing in medium containing 2% DMSO at initial  
124 concentration  $2 \times 10^5$  cells/ml for 7 to 10 days.

125

126 ii) Human erythroleukemia (K562) cell line, derived from chronic myeloid leukemia patient,  
127 predominantly expresses embryonic hemoglobin, Hb Glower I ( $\zeta_2\epsilon_2$ ), Hb Portland ( $\zeta_2\gamma_2$ )  
128 and fetal hemoglobin, HbF ( $\alpha_2\gamma_2$ ).<sup>5-7</sup> Cells were grown and maintained in DMEM  
129 supplemented with 10% FCS, 100 U/ml penicillin and 100 g/ml streptomycin at 37°C 5%  
130 CO<sub>2</sub>. K562 cells were induced to differentiate by culturing in media containing 30  $\mu$ M  
131 Hemin for 3-5 days.

132

133 iii) HUDEP-2 cell line was previously created by lentiviral transduction of human cord  
134 blood haematopoietic stem cells with doxycycline (DOX)-inducible human papilloma virus  
135 16 E6/E7 expression system.<sup>8</sup> The cells express mostly adult hemoglobin (HbA). HUDEP-  
136 2 cells containing biallelic  $\beta^0$ -globin mutations, termed  $\beta^0$ -HUDEP-2 cells, were created  
137 using CRISPR-Cas9 genome editing to recapitulate a sustainable in vitro model of  $\beta^0$ -  
138 thalassemia. Following clonal analysis, a  $\beta^0$ -HUDEP-2 *cell line with biallelic  $\beta$ -globin gene*

139 *disruptions* was identified by sanger sequencing (manuscript in preparation). Cells were  
140 grown at a density of  $0.1-2 \times 10^6$  cells/ml in StemSpan SFEM (Stem Cell technologies)  
141 supplemented with human stem cell factor (hSCF, 50 ng/ml), erythropoietin (EPO, 3  
142 IU/ml), dexamethasone (Dex, 1  $\mu$ M), and doxycycline (DOX, 1  $\mu$ g/ml), 1X  
143 pen/strep/glutamine (PSG). Differentiation of HUDEP-2 cells was induced by culture in  
144 IMDM supplemented with EPO (10 IU/ml), mifepristone (1  $\mu$ M), human AB serum (5%),  
145 holotransferrin (500  $\mu$ g/ml), heparin (2 IU/ml) and insulin (10  $\mu$ g/ml), 1X PSG.  
146 Differentiation media was replaced every two days and cell concentration was kept at 0.5-  
147  $1 \times 10^6$  cells/ml.

148

#### 149 **Human hematopoietic cells**

150 Human cells of de-identified donors were obtained from normal cord blood (CB) from  
151 Saint-Louis Hospital (Paris, France) and from non-mobilized peripheral blood of  
152 thalassemia patients from Ramathibodi Hospital (Bangkok, Thailand), following patient  
153 informed consent. They were enriched using the CD34 progenitor cell isolation kit (Miltenyi  
154 Biotec and the autoMACSPro instrument) according to manufacturer instructions. The  
155 study was approved by the ethics evaluation committees of the French Institute of Medical  
156 Research and of the Faculty of Medicine Ramathibodi Hospital, under protocol numbers  
157 16-315 and 06-57-07 respectively.

158

#### 159 **Mathematical model of $\alpha$ to $\beta$ -globin mRNA ratio decay according to vector copy** 160 **number**

161 In order to compare the level of globin transcripts between groups of cells transduced with  
162 BB305 or LV $\beta$ -shRNA,  $\alpha$ -globin to  $\beta$ -globin mRNA ratios were determined at several time



163 points after erythroid differentiation and eventually normalized to those measured in non-  
164 transduced cells at the same time point. The resulting values were plotted as a function  
165 of VCNs, and the exponential decay equation model ( $Y=e^{-kx}$ , where Y is the mRNA ratio, K  
166 is the decay rate and X is the vector copy number) was used to fit the data. For comparison  
167 of groups using this model, the transcript ratios were fixed to 0 at infinite VCNs (bottom  
168 plateau) and to 1 in the absence of transduction when normalized. The influence of shRNA  
169 on  $\alpha/\beta$  globin mRNA ratio and the differential vector efficiencies were calculated according  
170 to this model. When  $Y1=e^{-k1x1}$  and  $Y2=e^{-k2x2}$ , the fold difference between  $\alpha/\beta$  mRNA ratios  
171 is equal to  $e^{-k1x1}/e^{-k2x2}$ . Therefore, the mean fold variation of  $\alpha/\beta$  mRNA ratios per vector  
172 copy is equal to  $e^{(k2-k1)}$ . When the  $\alpha$ -globin to  $\beta$ -globin mRNA ratio are equal ( $Y1=Y2$ ),  $e^{-$   
173  $k1x1=e^{-k2x2}$ . Therefore, at equal  $\alpha:\beta$  mRNA ratio, the VCN ratio ( $x1/x2$ ) is equal to  $k2/k1$ .

174

175

176

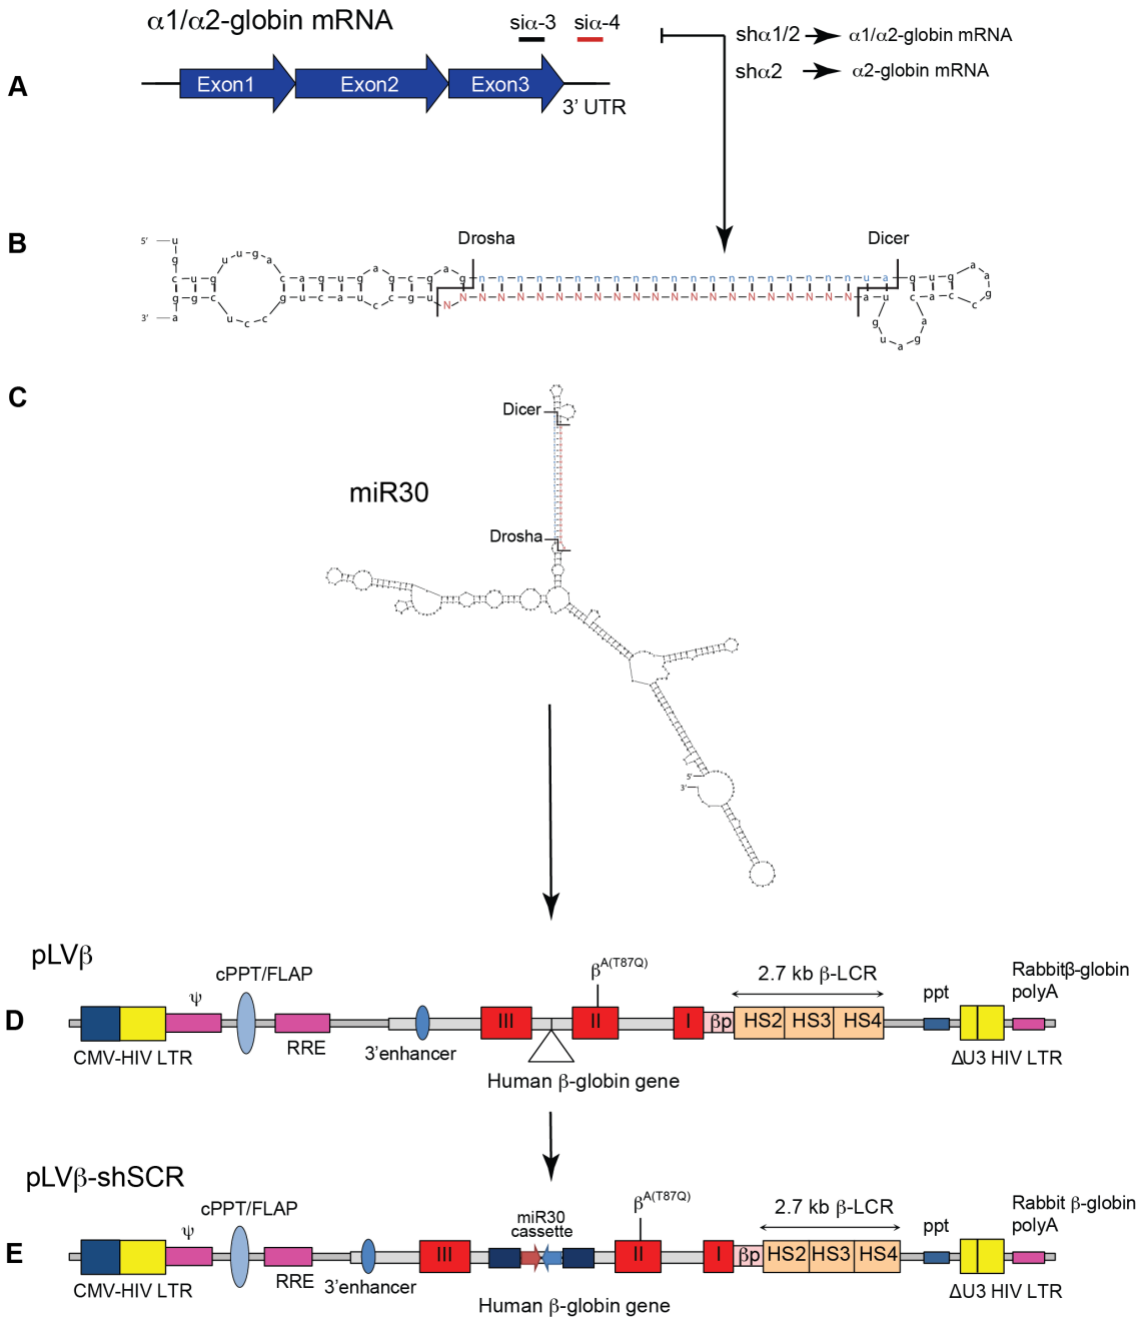

182 **Figure S1. Schematic diagram illustrating the construction of the LV $\beta$ -shRNA**  
183 **vector containing miR30-shRNA expression cassette. A)** Schematic diagram of  
184 human  $\alpha$ -globin mRNA showing the target sites for sia-3 and sia-4 which are adapted into  
185 **B)** miR30-based shRNA; sha1/2 and sha2, respectively. **C)** Predicted secondary  
186 structure of miR30-shRNA expression cassette generated by mfold. miR30-based shRNA  
187 is flanked by 125-nt of miR30 flanking region on either side of the hairpin. Sequence for  
188 target site (sense orientation) is shown in blue lowercase letter, while the guide strand  
189 sequence is shown in red uppercase letters. Putative Drosha and Dicer cleavage sites  
190 are indicated by horizontal lines.<sup>9</sup> miR30-shRNA expression cassette is inserted into **D)**  
191 the LentiGlobin BB305 (pLV $\beta$ ) gene therapy vector encoding the  $\beta^{A-T87Q}$ -globin gene to  
192 generate **E)** pLV $\beta$ -shRNA vector containing the intronic miR30-shRNA expression  
193 cassette. The  $\beta^{A-T87Q}$ -globin gene is placed under control of the human  $\beta$ -globin promoter  
194 ( $\beta$ p) and elements from the human  $\beta$ -globin locus control region (LCR), 5'DNaseI  
195 hypersensitive sites (HS2-4), truncated  $\beta$ -globin Intron 2 containing a 374bp *Rsa*I site  
196 deletion ( $\Delta$ ), long terminal repeat (LTR), extended packaging signal ( $\psi$ ), miR30-shRNA  
197 expression cassette flanked by the 5'miR30 and 3'miR30 scaffold, hybrid human  
198 immunodeficiency type-1 virus long terminal repeat (HIV-LTR) whereby the U3 region of  
199 5' HIV LTR is replaced with cytomegalovirus (CMV) promoter (CMV-R-U5), deletion in the  
200 U3 ( $\Delta$ U3) region of 3' HIV-LTR, Rev-responsive element (RRE) and polypurine tract (ppt).  
201

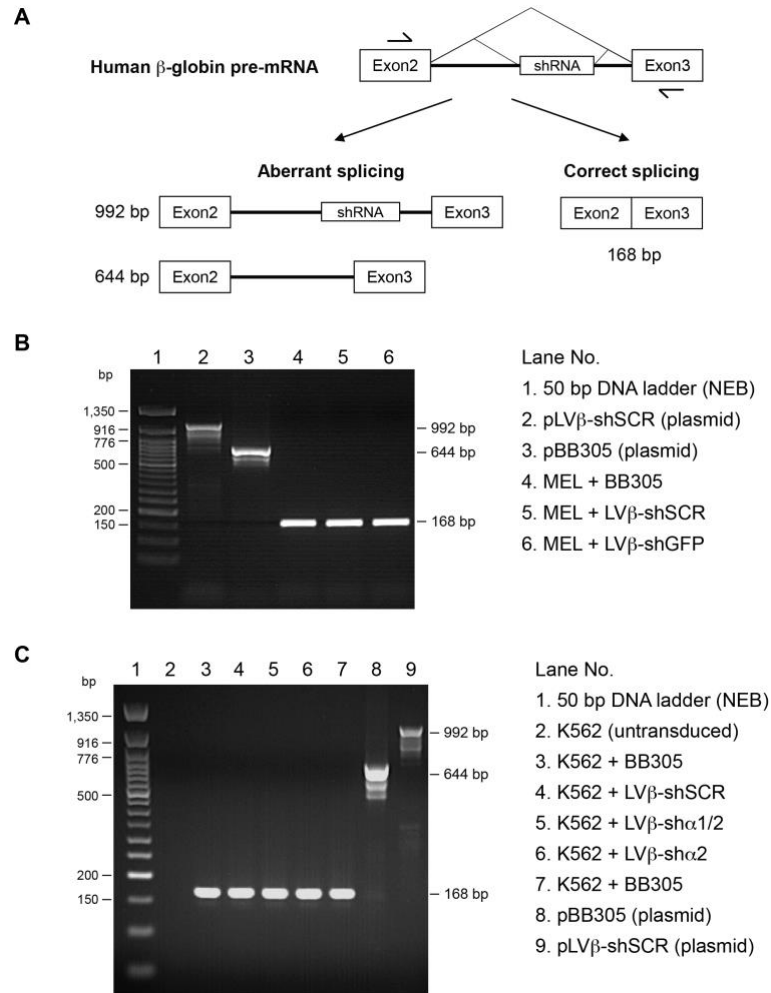

202

203 **Figure S2. Analysis of human  $\beta$ -globin mRNA splicing following transduction of**

204 **BB305 and LV $\beta$ -shRNA vectors. A) Diagram of human  $\beta$ -globin splicing and location of**

205 **PCR spanning  $\beta$ -globin exon 2 to exon 3. B) Analysis of human  $\beta$ -globin mRNA splicing**

206 **in MEL- $\beta$ eGFP cells transduced with BB305 and LV $\beta$ -shGFP vectors C) Human  $\beta$ -globin**

207 **mRNA splicing in K562 cells transduced with BB305, LV $\beta$ -sh $\alpha$ 1/2 and LV $\beta$ -sh $\alpha$ 2 vectors.**

208 **PCR products were visualized on 1% agarose gel electrophoresis. A single PCR product**

209 **of the expected size (168 bp) representing the correctly spliced  $\beta^{A-T87Q}$ -globin mRNA was**

210 **identified in cells transduced with BB305 and LV $\beta$ -shRNA vectors (b: Lanes 4-6; c: Lanes**

211 **3-7).**

212

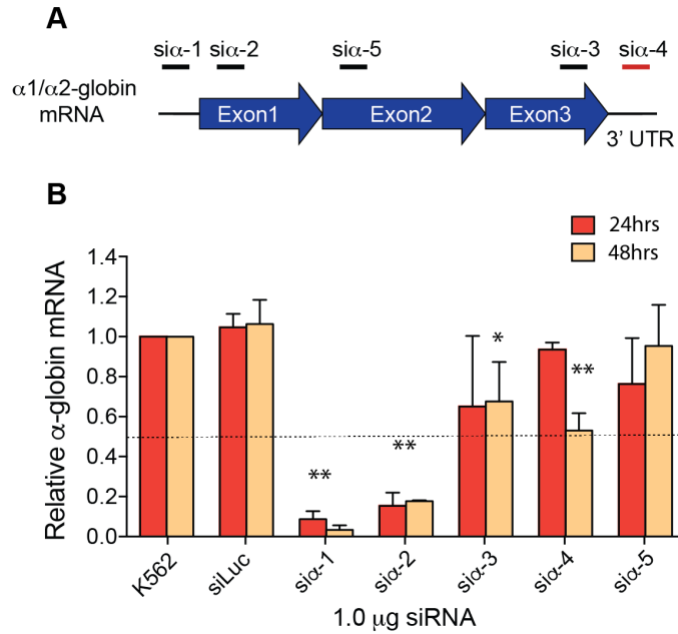

213

214 **Figure S3. Relative  $\alpha$ -globin mRNA expression in K562 cells following**

215 **electroporation of human  $\alpha$ -globin-specific siRNAs. A)** Schematic diagram of human

216  $\alpha$ -globin mRNA showing the target sites for si $\alpha$ -1, si $\alpha$ -2, si $\alpha$ -3, si $\alpha$ -4 and si $\alpha$ -5 siRNAs. **B)**

217 Relative  $\alpha$ -globin RNA expression post electroporation of 1  $\mu$ g of siRNA. Relative

218 expression of  $\alpha$ -globin was normalized to relative expression levels in mock

219 electroporated K562 cells using  $\beta$ -actin expression as an RNA loading control. An siRNA

220 sequence targeting luciferase (siLuc) was included in all experiments as an irrelevant

221 control. Values represent the mean average of at least three independent experiments

222 (mean $\pm$ SD). Statistical analysis was performed using one-way ANOVA (\*p $\leq$ 0.05,

223 \*\*p $\leq$ 0.01).

224

**A**

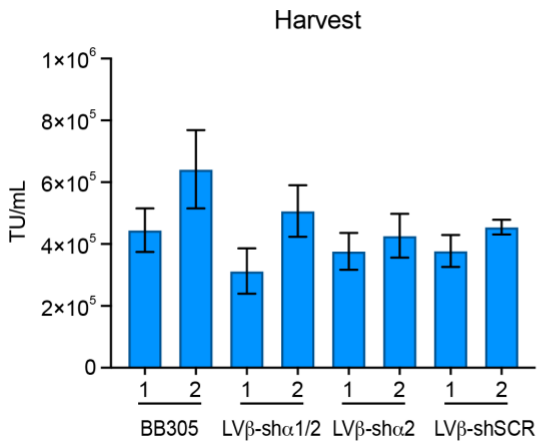

**B**

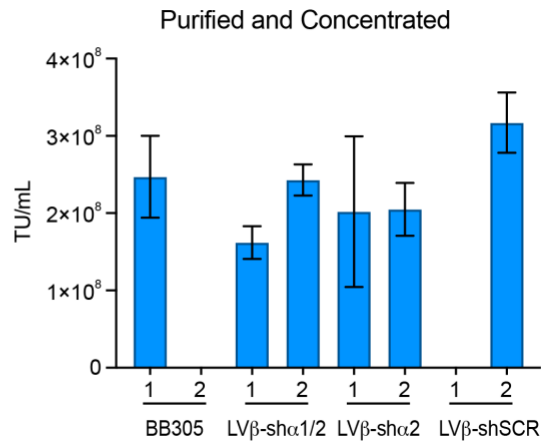

225

226

227

228

229

230

**Figure S4. Comparison of lentiviral vector titres.** **A)** Lentiviral titre from culture supernatants harvested 24 hours post-transfection of HEK 293T cells (2 independent productions per vector) **B)** Lentiviral titre of harvested lentiviral vector following purification by ion exchange chromatography and 1000-fold concentration.

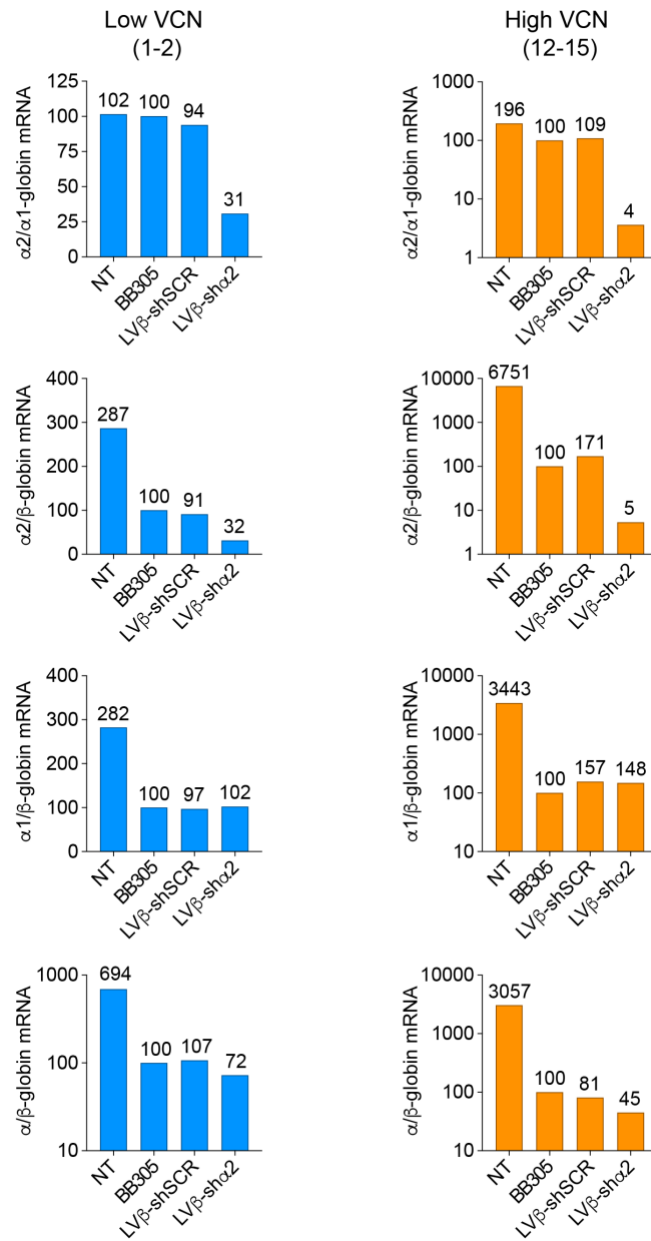

232

233

234 **Figure S5. Analysis of globin mRNA ratio in transduced  $\beta^0$ -HUDEP-2 cells. RT-qPCR**

235 were made from RNA extracted in proliferating  $\beta^0$ -HUDEP-2 cells transduced at low VCN

236 (1-2) and high VCN (12-15).

237

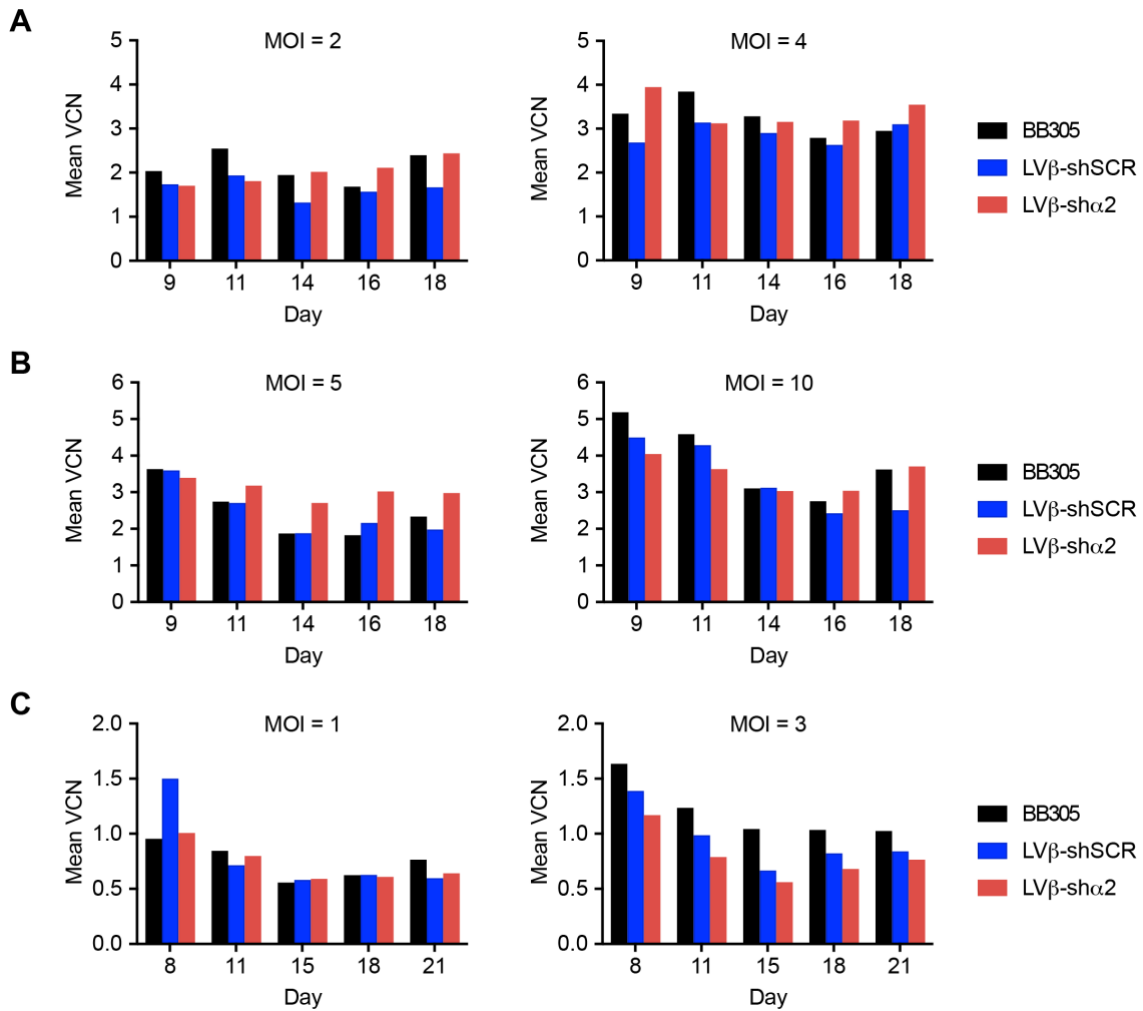

239

240 **Figure S6. Vector copy number in transduced primary cells.** Cord blood (A) and  
 241 HbE/ $\beta$ -thalassemia erythroid cells from patient 1 (B) and patient 2 (C) were transduced  
 242 with BB305, LV $\beta$ -shSCR and LV $\beta$ -sh $\alpha$ 2 vectors, and grown in differentiation medium 1  
 243 (A, B) or differentiation medium 2 (C).



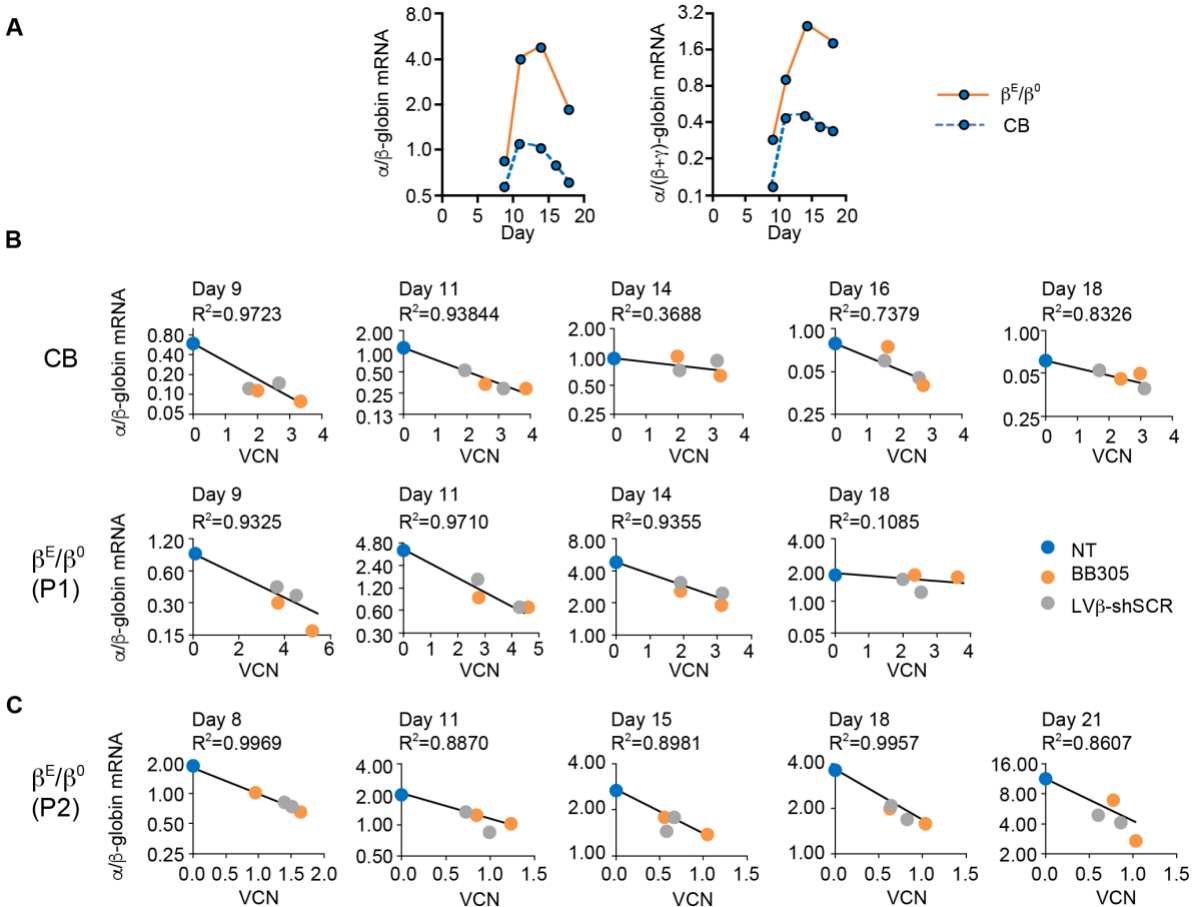

244  
 245  
 246 **Figure S7. Analysis of  $\alpha/(\beta$  like)-globin mRNA ratio relative to VCN** **A)** Analysis of  
 247  $\alpha/(\beta$  like)-globin mRNA ratio in unmodified primary cells from cord blood (CB) and HbE/ $\beta$ -  
 248 thalassemia patient collected at several time points after erythroid differentiation. **B)**  
 249 Globin mRNA ratios in transduced cells from CB and HbE/ $\beta$ -thalassemia patient (P1)  
 250 relative to VCN. **C)** Globin mRNA ratios in unmodified and transduced cells from second  
 251 HbE/ $\beta$ -thalassemia patient (P2), grown three weeks in medium 2. The values are  
 252 distributed in a similar way around the regression line, whether they come from samples  
 253 transduced by BB305 or LV $\beta$ -shSCR.

254  
 255

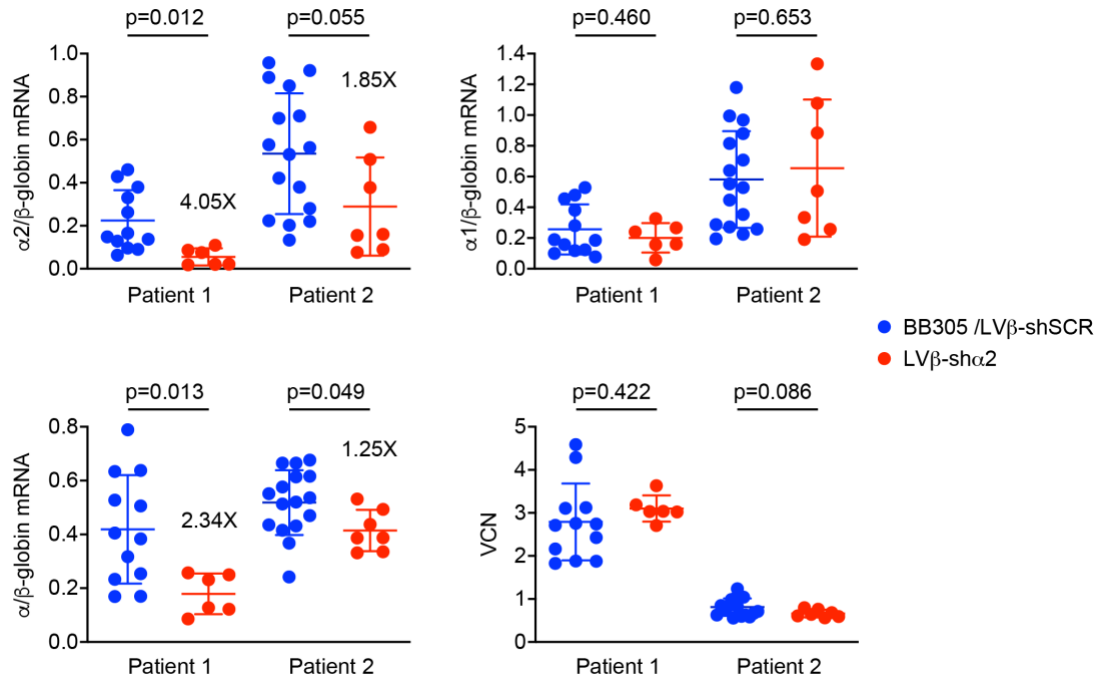

256  
 257 **Figure S8. Analysis of  $\alpha/\beta$ -globin ratios and VCNs in transduced primary**  
 258 **HbE/ $\beta$ -thalassemia erythroid cells.**  $\alpha_2/\beta$  -,  $\alpha_1/\beta$ -,  $\alpha/\beta$ -globin mRNA ratios and VCNs in  
 259 transduced primary cells from two patients with HbE/ $\beta$ -thalassemia. Cells were grown for  
 260 three weeks in medium 1 (P1) or 2 (P2) and transduced at MOI 5 and 10 (P1) or 1 and 3  
 261 (P2). mRNA ratios were normalized to non-transduced cells (set to 1).  
 262

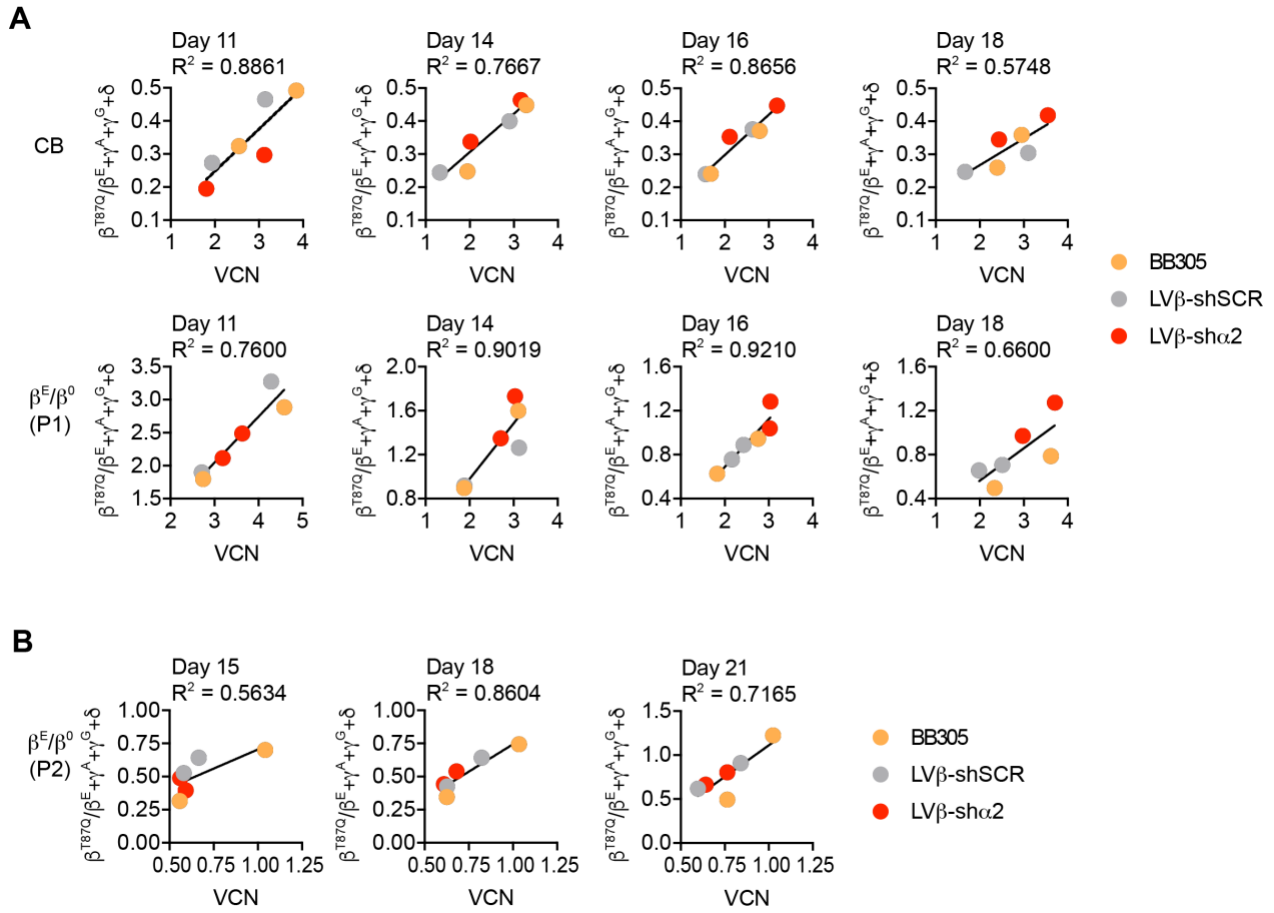

264

265 **Figure S9. Expression of  $\beta^{A-T87Q}$ -globin is not affected by shRNA.**  $\beta^{A-T87Q}$ -globin  
 266 expression relative to other  $\beta$ -like globin chains, determined by RP-HPLC in erythroid cell  
 267 derived from cord blood (CB) and HbE/ $\beta$ -thalassemia samples (patient 1; P1 and patient  
 268 2; P2) grown in medium 1 (**A**) or 2 (**B**), after transduction with BB305, LV $\beta$ -shSCR, or  
 269 LV $\beta$ -sha2.

270

271

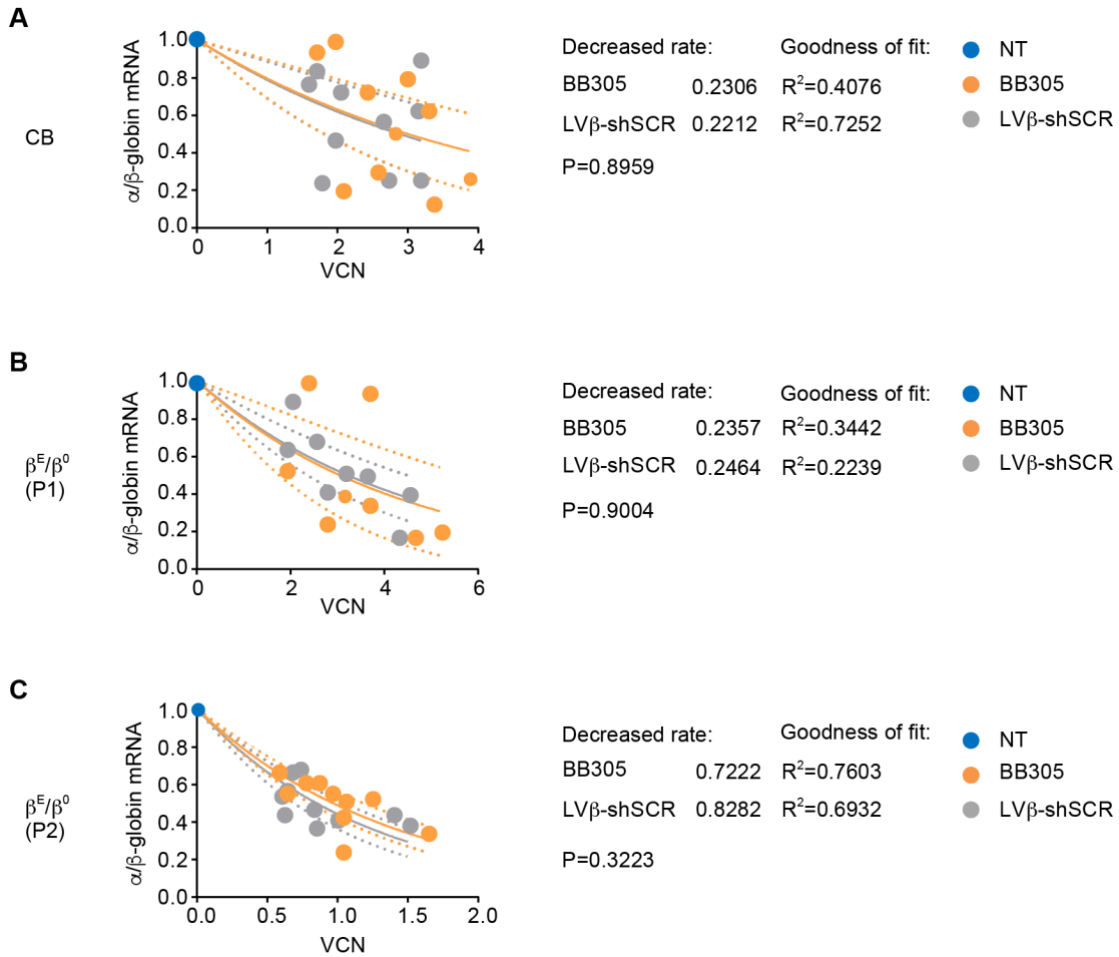

272

273

274 **Figure S10. Analysis of  $\alpha/\beta$ -globin mRNA ratio relative to VCN.** A) Analysis of  $\alpha/\beta$ -

275 globin mRNA ratio in transduced cord blood (CB), B) HbE/ $\beta$ -thalassemia (P1) and C)

276 HbE/ $\beta$ -thalassemia (P2). Globin mRNA ratios are calculated from transduced samples

277 after normalization to values measured in non-transduced cells. Best fit curves and 95%

278 confidence intervals are shown. Determination of P values for comparison of decreased

279 rates in samples transduced with BB305 and LV $\beta$ -shSCR vectors were performed

280 assuming ratios of 1 in unmodified cells and 0 at infinite VCN.

281

282 **SUPPLEMENTAL TABLES**

283

284 **Table S1: Oligonucleotides and primers use for construction of the LV $\beta$ -shRNA vectors**

285

| Assay                                | Primers    | Sequence (5'-3')                                                                                                   |
|--------------------------------------|------------|--------------------------------------------------------------------------------------------------------------------|
| Generation of shGFP                  | shGFP Fwd  | ACT <u>CTCGAGA</u> AAGGTATATTGCTGTTGACAGTGAGCGAG <b>CAC</b><br><b>AAGCTGGAGTACA</b> <i>ACTA TAGTGAAGCCACAG</i> *   |
|                                      | shGFP Rev  | ATTGAATT <u>CCGAGGC</u> AGTAGGCCA <b>CACA</b> <b>AAGCTGGAGTACA</b> <b>AC</b><br><b>TA</b> <i>TACATCTGTGGCTTC</i> * |
| Generation of sha1/2                 | sha1/2 Fwd | ACT <u>CTCGAGA</u> AAGGTATATTGCTGTTGACAGTGAGCGAT <b>GAG</b><br><b>CACCGTGCTGACCTCCA</b> <i>TAGTGAAGCCACAG</i> *    |
|                                      | sha1/2 Rev | ATTGAATT <u>CCGAGGC</u> AGTAGGCCA <b>GTGAGC</b> <b>ACCGTGCTGACC</b><br><b>TCCA</b> <i>TACATCTGTGGCTTC</i> *        |
| Generation of sha2                   | sha2 Fwd   | ACT <u>CTCGAGA</u> AAGGTATATTGCTGTTGACAGTGAGCGA <b>CGGC</b><br><b>CCTTCCTGGTCTTTGAA</b> <i>TAGTGAAGCCACAG</i> *    |
|                                      | sha2 Rev   | ATTGAATT <u>CCGAGGC</u> AGTAGGCCA <b>CGGC</b> <b>CCTTCCTGGTCTT</b><br><b>TGAA</b> <i>TACATCTGTGGCTTC</i> *         |
| Screening of pLV $\beta$ -shRNA      | BG-Ex1     | CTGACACA <b>ACTGTGTTCACT</b>                                                                                       |
|                                      | shRNA Rev  | GTGCAGGGT <b>CCGAGGT</b>                                                                                           |
| Screening of pIntron2 shuttle vector | T7         | GATATACGACTCACTATAGGGC                                                                                             |
|                                      | BG-Int2    | CTGTGGCAGCAAGATAAGAG                                                                                               |

286 \* Underline: restriction sites for shRNA cloning, bold: anti-sense and sense sequences, italic: loop  
287 sequences

288

289  
290

**Table S2: siRNA and shRNA sequences**

| shRNAs                    | Sequence (5'-3')                                                                                                         | Target                                                 |
|---------------------------|--------------------------------------------------------------------------------------------------------------------------|--------------------------------------------------------|
| si $\alpha$ -1 sense      | r(CAGACUCAGAGAGAACCCA)dTdT                                                                                               | 5'UTR                                                  |
| si $\alpha$ -1 anti-sense | r(UGGGUUCUCUCUGAGUCUG)dTdG                                                                                               | 5'UTR                                                  |
| si $\alpha$ -2 sense      | r(CCGACAAGACCAACGUCAA)dTdT                                                                                               | Exon 1                                                 |
| si $\alpha$ -2 antisense  | r(UUGACGUUGGUCUUGUCGG)dCdA                                                                                               | Exon 1                                                 |
| si $\alpha$ -3 sense      | r(CCGUGCUGACCUCCAAAUA)dTdT                                                                                               | Exon 3                                                 |
| si $\alpha$ -3 antisense  | r(UAUUUGGAGGUCAGCACGG)dTdG                                                                                               | Exon 3                                                 |
| si $\alpha$ -4 sense      | r(GGCCCUUCCUGGUCUUUGA)dTdT                                                                                               | 3'UTR of $\alpha$ 2-globin mRNA                        |
| si $\alpha$ -4 antisense  | r(UCAAAGACCAGGAAGGGCC)dGdG                                                                                               | 3'UTR of $\alpha$ 2-globin mRNA                        |
| si $\alpha$ -5 sense      | r(GACCUACUUCCCGCACUUC)dTdT                                                                                               | Exon 2                                                 |
| si $\alpha$ -5 antisense  | r(GAAGUGCGGGAAGUAGGUC)dTdT                                                                                               | Exon2                                                  |
| sh $\alpha$ 1/2           | tgctgttgacagtgagcgaGAGCACCGTGCTGACCTCCAA<br>TAgtgaagccacagatgta <b>TTGGAGGTCAGCACGGTGCT</b><br><b>CG</b> tcctactgcctcgga | Exon 3 of<br>$\alpha$ 1 and $\alpha$ 2-globin<br>mRNAs |
| sh $\alpha$ 2             | tgctgttgacagtgagcgaCGGCCCTTCCTGGTCTTTGAA<br>TAgtgaagccacagatgta <b>TTCAAAGACCAGGAAGGGC</b><br><b>CGG</b> tcctactgcctcgga | 3' UTR of<br>$\alpha$ 2-globin mRNA                    |
| shGFP                     | tgctgttgacagtgagcgaGCACAAGCTGGAGTACAATA<br>TAgtgaagccacagatgta <b>TAGTTGTA</b> CTCCAGCTTGTG<br><b>CC</b> tcctactgcctcgga | eGFP mRNA                                              |
| shSCR                     | tgctgttgacagtgagcgaTCTCGCTTGGGCGAGAGTAAG<br>TAgtgaagccacagatgta <b>CTTACTCTCGCCCAAGCGAG</b><br><b>CG</b> tcctactgcctcgga | Non-targeting control                                  |

Bold uppercase: antisense sequences, regular uppercase: sense sequences, italic: loop sequence.

291  
292  
293

294  
295  
296

**Table S3: Primers and probes used for vector copy number determination** <sup>10</sup>

| Assay              | Amplicon             | Primer and probe | Sequence (5'-3') or TaqMan gene expression assay number* | Modification       | Conc. |
|--------------------|----------------------|------------------|----------------------------------------------------------|--------------------|-------|
| Vector copy number | Lentiviral vector    | GAG F            | GGAGCTAGAACGATTCGC<br>AGTTA                              | -                  | 720nM |
|                    |                      | GAG R            | GGTTGTAGCTGTCCCAGT<br>ATTTGTC                            | -                  | 720nM |
|                    |                      | GAG P            | ACAGCCTTCTGATGTCTC<br>TAAAAGGCCAGG                       | 5'FAM<br>3'TAMRA   | 140nM |
|                    | Human $\beta$ -actin | hbAct F          | TCCGTGTGGATCGGCGG<br>CTCCA                               | -                  | 900nM |
|                    |                      | hbAct R          | CTGCTTGCTGATCCACAT<br>CTG                                | -                  | 900nM |
|                    |                      | hbAct P          | CCTGGCCTCGCTGTCCAC<br>CTTCCA                             | 5'FAM<br>3'TAMRA   | 250nM |
| NIH3T3 titer       | Mouse $\beta$ -actin | mbAct assay      | Mm00607939_S1*                                           | 5'FAM<br>3'NFQ-MGB | 1x    |

297 FAM, 6-carboxyfluorescein ester; TAMRA, tetramethyl-6-carboxyrhodamine; NFQ, nonfluorescent  
298 quencher; MGB, minor groove binder; Conc., concentration  
299 \* Applied Biosystems.  
300

301  
302

**Table S4: Primers and Probes used for RT-qPCR**

| Assay                                      | Amplicon                    | Primer and probe | Sequence (5'-3') or TaqMan gene expression assay number* | Modification          | Conc. |
|--------------------------------------------|-----------------------------|------------------|----------------------------------------------------------|-----------------------|-------|
| eGFP expression (SYBR Green)               | EGFP                        | eGFP F           | AACGTCTATATCATGGCCGA                                     | -                     | 250nM |
|                                            |                             | eGFP R           | TGCACGCTGCCGTCCTCGAT                                     | -                     | 250nM |
|                                            | Mouse $\beta$ -actin        | mmACTB F         | CAACGAGCGGTTCCGATG                                       | -                     | 250nM |
|                                            |                             | mmACTB R         | TACCCAAGAAGGAAGGCTGGA                                    | -                     | 250nM |
| shGFP expression (SYBR Green)              | shGFP                       | shGFP F          | GCGTATAGTTGTACTIONCAGC                                   | -                     | 250nM |
|                                            |                             | shRNA R          | GTGCAGGGTCCGAGGT                                         | -                     | 250nM |
|                                            |                             | shGFP-RT         | GTCGTATCCAGTGCAGGGTCCGAGGTATTCGCACTGGATACGACGCACAA       | Reverse transcription |       |
|                                            |                             | shGFP-3p         | TAGTTGTACTIONCAGCTTGTGC                                  | Oligo control         |       |
| $\alpha/(\beta+\gamma)$ ratio (TaqMan)     | $\alpha 1/\alpha 2$ -globin | HBA1/HBA2        | Hs00361191_g1*                                           | 5'FAM<br>3'NFQ-MGB    | 1X    |
|                                            | $\beta$ -globin             | HBB              | Hs00747223_g1*                                           | 5'FAM<br>3'NFQ-MGB    | 1X    |
|                                            | $A\gamma/G\gamma$ -globin   | HBG1/HBG2        | Hs00361131_g1*                                           | 5'FAM<br>3'NFQ-MGB    | 1X    |
| $\alpha 1$ -globin expression (SYBR Green) | $\alpha 1$ -globin          | HBA1 F           | CTCGGTGGCCATGCTTCT                                       | -                     | 200nM |
|                                            |                             | HBA1 R           | GGGTACGGGTGCAGGA                                         | -                     | 200nM |
| $\alpha 2$ -globin expression (SYBR Green) | $\alpha 2$ -globin          | HBA2 F           | CTCGGTAGCCGTTCCCTCC                                      | -                     | 200nM |
|                                            |                             | HBA2 R           | GAAGGGCCGGTGCAAGG                                        | -                     | 200nM |
| $\beta$ -globin expression (SYBR Green)    | $\beta$ -globin             | HBB F            | GCACGTGGATCCTGAGAACT                                     | -                     | 250nM |
|                                            |                             | HBB R            | ACCAGCCACCACTTTCTGAT                                     | -                     | 250nM |
| Reference gene                             | Human $\beta$ -actin        | hsACTB F         | AGGCACCAGGGCGTGAT                                        | -                     | 250nM |
|                                            |                             | hsACTB R         | TCGCCACATAGGAATCCTT                                      | -                     | 250nM |
| $\beta A$ -T87Q-globin mRNA splicing       | $\beta A$ -T87Q-globin      | HBBT87Q F        | TCAAGGGCACCTTTGCCAG                                      | -                     | 500nM |
|                                            |                             | HBB R            | ACCAGCCACCACTTTCTGAT                                     | -                     | 500nM |

303  
304  
305

FAM: 6-carboxyfluorescein ester, NFQ: non-fluorescent quencher, MGB: minor groove binder, Conc: Concentration, \*ThermoFisher Scientific



306  
307  
308

**Table S5: Antibodies**

| Antibodies                                | Assay                 | Supplier (Cat. No.)                        |
|-------------------------------------------|-----------------------|--------------------------------------------|
| Fixable Viability Dye eFluor™ 780         | Flow cytometry        | eBioscience (65-0865-14)                   |
| Propidium Iodide                          | Flow cytometry        | Sigma Aldrich (P4864)                      |
| Hemoglobin $\alpha$ (D4) Alexa Fluor® 647 | Flow cytometry        | Santa Cruz Biotechnology (sc-514378 AF647) |
| Hemoglobin $\beta$ (37-8) PE              | Flow cytometry        | Santa Cruz Biotechnology (sc-21757 PE)     |
| PE mouse anti-human CD36 (Ac106)          | Flow cytometry        | Miltenyi (130-095-472)                     |
| APC mouse anti-human CD71 (Ac102)         | Flow cytometry        | Miltenyi (130-091-727)                     |
| FITC mouse anti-human CD235a (HIR2)       | Flow cytometry        | eBiosciences (11-9987)                     |
| Hemoglobin $\alpha$ (D-4);                | Western blot          | Santa Cruz Biotechnology (sc-514378)       |
| Hemoglobin $\beta$ (37-8)                 | Western blot (K562)   | Santa Cruz Biotechnology (sc-21757)        |
| $\beta$ -actin (C4)-HRP                   | Western blot (K562)   | Santa Cruz Biotechnology (sc-47778)        |
| Goat anti-mouse IgG-HRP:                  | Western blot (K562)   | Santa Cruz Biotechnology (sc-2005)         |
| HBB monoclonal antibody (M02) clone 7B12  | Western blot (HUDEP2) | Abnova (H00003043-M02)                     |
| HBA monoclonal antibody (MO2) clone 4F9   | Western blot (HUDEP2) | Abnova (H00003039-M02)                     |
| Goat anti-mouse IgG-HRP                   | Western blot          | Jackson ImmunoResearch (115-035-006)       |

309

310 **SUPPLEMENTAL REFERENCES:**

- 311 1. Westerman, KA, Ao, Z, Cohen, EA, and Leboulch, P (2007). Design of a trans  
312 protease lentiviral packaging system that produces high titer virus. *Retrovirology* **4**:  
313 96.
- 314 2. Kong, Y, Zhou, S, Kihm, AJ, Katein, AM, Yu, X, Gell, DA, *et al.* (2004). Loss of  
315 alpha-hemoglobin-stabilizing protein impairs erythropoiesis and exacerbates beta-  
316 thalassemia. *J Clin Invest* **114**: 1457-1466.
- 317 3. Sorensen, S, Rubin, E, Polster, H, Mohandas, N, and Schrier, S (1990). The role  
318 of membrane skeletal-associated alpha-globin in the pathophysiology of beta-  
319 thalassemia. *Blood* **75**: 1333-1336.
- 320 4. Chan, KS, Xu, J, Wardan, H, McColl, B, Orkin, S, and Vadolas, J (2012).  
321 Generation of a genomic reporter assay system for analysis of gamma- and beta-  
322 globin gene regulation. *FASEB J* **26**: 1736-1744.
- 323 5. Vadolas, J, Wardan, H, Orford, M, Voullaire, L, Zaibak, F, Williamson, R, *et al.*  
324 (2002). Development of sensitive fluorescent assays for embryonic and fetal  
325 hemoglobin inducers using the human beta -globin locus in erythropoietic cells.  
326 *Blood* **100**: 4209-4216.
- 327 6. Lozzio, CB, and Lozzio, BB (1975). Human chronic myelogenous leukemia cell-  
328 line with positive Philadelphia chromosome. *Blood* **45**: 321-334.
- 329 7. Rutherford, T, Clegg, JB, Higgs, DR, Jones, RW, Thompson, J, and Weatherall,  
330 DJ (1981). Embryonic erythroid differentiation in the human leukemic cell line K562.  
331 *Proc Natl Acad Sci U S A* **78**: 348-352.

- 332 8. Kurita, R, Suda, N, Sudo, K, Miharada, K, Hiroyama, T, Miyoshi, H, *et al.* (2013).  
333 Establishment of immortalized human erythroid progenitor cell lines able to  
334 produce enucleated red blood cells. *PLoS One* **8**: e59890.
- 335 9. Dickins, RA, Hemann, MT, Zilfou, JT, Simpson, DR, Ibarra, I, Hannon, GJ, *et al.*  
336 (2005). Probing tumor phenotypes using stable and regulated synthetic microRNA  
337 precursors. *Nat Genet* **37**: 1289-1295.
- 338 10. Payen, E, Colomb, C, Negre, O, Beuzard, Y, Hehir, K, and Leboulch, P (2012).  
339 Lentivirus vectors in beta-thalassemia. *Methods Enzymol* **507**: 109-124.
- 340
